# Supplementary material for: α-Synuclein fibrils enhance HIV-1 infection of human T cells, macrophages and microglia
Source: Research Square preprint supplement (doi:10.21203/rs.3.rs-4383342/v1), 2024-05-14
Supplement: Supplementary file 1 [file 488651a22475f8201d627e58.pdf]

Supplementary Materials for:

**$\alpha$ -Synuclein fibrils enhance HIV-1 infection of human T cells, macrophages, and microglia**

Olari, Liu *et al.*

\*Corresponding author. Email: [frank.kirchhoff@uni-ulm.de](mailto:frank.kirchhoff@uni-ulm.de)

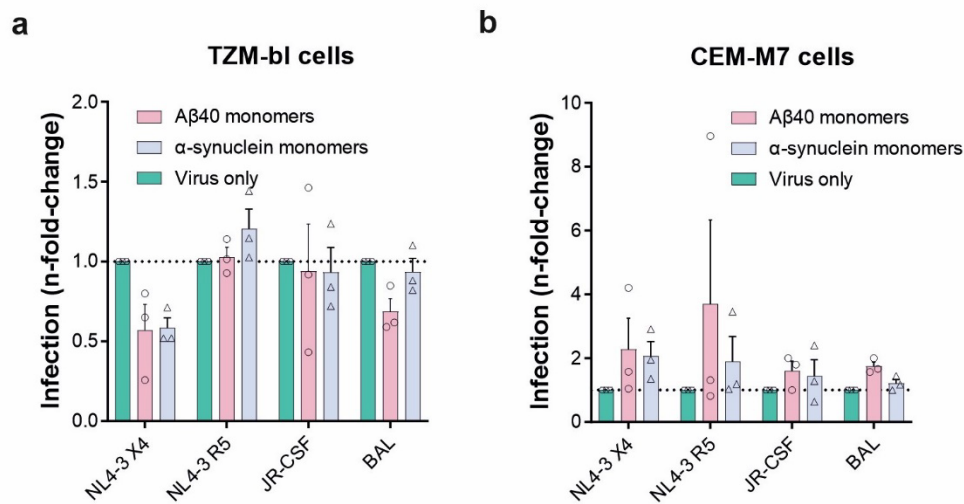

**Supplementary Fig. 1. Effect of Aβ40 and  $\alpha$ -synuclein monomers on HIV-1 infection. (a, b)**

Aβ40,  $\alpha$ -synuclein monomers (50  $\mu$ g/mL) were pre-incubated with different HIV-1 strains and added to **(a)** TZM-bl and **(b)** CEM-M7 cells. Infection was quantified three days post-infection by detecting the expression of  $\beta$ -galactosidase in the TZM-bl cells or quantifying the GFP<sup>+</sup> CEM-M7 cells by flow cytometry. Values were corrected for the background signal derived from the uninfected cells, and infection efficiencies are provided as *n*-fold changes relative to those observed in the absence of peptide (1x). Shown is the mean of three independent experiments measured in triplicates  $\pm$  SEM.

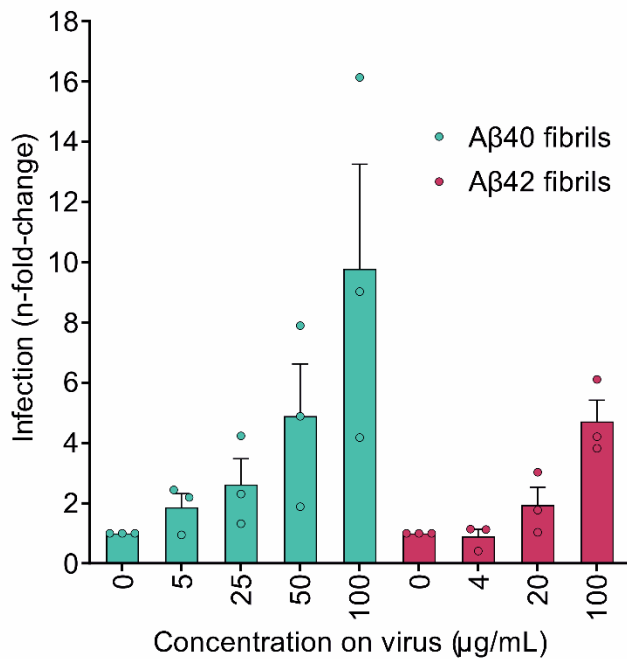

**Supplementary Fig. 2. Effect of Aβ40 and Aβ42 on HIV-1 infection.** Aβ40 or Aβ42 fibrils at indicated concentrations were pre-incubated with different HIV-1 strains and added to TZM-bl cells. Infection was quantified three days post-infection by detecting the expression of β-galactosidase. Values were corrected for the background signal derived from the uninfected cells, and infection efficiencies are provided as n-fold changes relative to those observed in the absence of peptide (1x). Shown is the mean of three independent experiments measured in triplicates ± SEM.

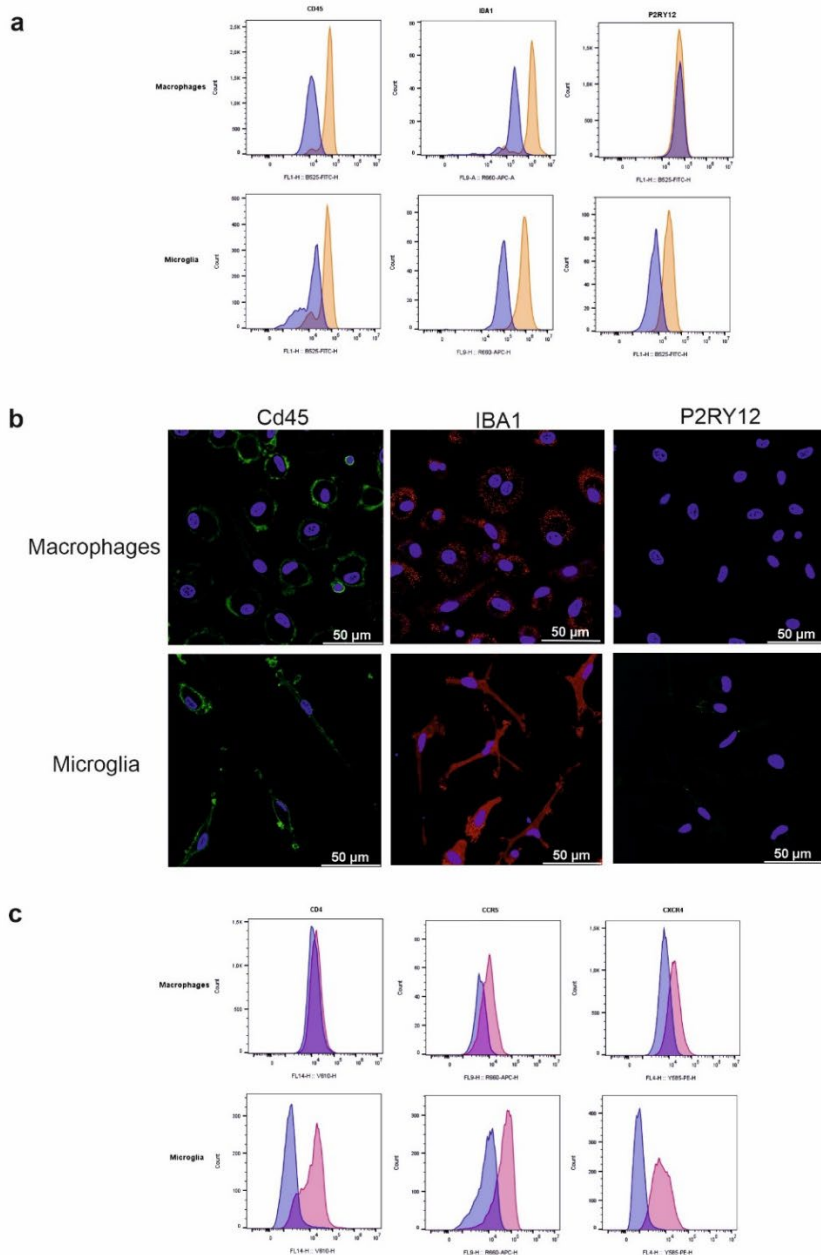

**Supplementary Fig. 3. Characterization of PBMC-derived macrophages and microglia.** (a, b) Evaluation of myeloid cell markers CD45, IBA1, and P2RY12 expression by (a) Flow cytometry and (b) confocal microscopy. In (a), isotype controls staining histograms (blue) are overlaid with the antibody staining (orange). (b) Scale bar indicate 50  $\mu$ m. Images were taken with a Leica DM8i confocal microscope (Leica). (c) Evaluation of HIV-1 receptor CD4, and co-receptors CCR5 and CXCR4 expression by flow cytometry. Isotype controls staining histograms (blue) are overlaid with the antibody staining (pink).
