# Supplementary material for: α-Synuclein fibrils enhance HIV-1 infection of human T cells, macrophages and microglia
Source: Research Square preprint supplement (doi:10.21203/rs.3.rs-4383342/v1), 2024-05-14
Supplement: Supplementary file 2 [file 920e45eea313576a7dcf38d4.pdf]

**Supplementary Table 1. Human brain lysates analyzed in this study.** Post-mortem tissue was provided by the Laboratory of Neuropathology at Ulm University and neuropathologically characterized by D.R. Thal. Diagnosis: Alzheimer's disease (AD), primary age-related tauopathy (PART); Braak neurofibrillary tangles (NFT) stages (1-6)<sup>77</sup>, A $\beta$  phase (0-5)<sup>78</sup>, and the CERAD (Consortium to Establish a Registry for Alzheimer's Disease) score for neuritic plaque density (0-3)<sup>79</sup>; NIA-AA degree of AD pathology (0-3)<sup>80</sup>; Braak Lewy body disease (LBD) stages (0-6)<sup>81</sup>.

| AD              | Braak-LBD | Age | Gender | Diagnosis | Braak-NFT | A $\beta$ Phase | CERAD | NIA-AA Degree of AD |
|-----------------|-----------|-----|--------|-----------|-----------|-----------------|-------|---------------------|
| AD-1            | n.d.      | 91  | F      | AD        | 4         | 3               | 1     | 2                   |
| LBD-1           | 4         | 71  | F      | PART      | 1         | 0               | 0     | 0                   |
| AD-2 LBD-2      | 6         | 84  | M      | AD        | 6         | 4               | 3     | 3                   |
| <b>Controls</b> |           |     |        |           |           |                 |       |                     |
| Control 1       | 0         | 62  | M      | PART      | 1         | 0               | 0     | 0                   |
| Control 2       | 0         | 69  | F      | PART      | 1         | 0               | 0     | 0                   |
| Control 3       | 0         | 66  | M      | PART      | 1         | 0               | 0     | 0                   |
